# Supplementary material
Source: HighWire-hosted journal article supplement (https://thorax.bmj.com/content/75/10/831)
Supplement: inline-supplementary-material-1 [file inline-supplementary-material-1.pdf]

## Supplementary Material

### Delivering Low-dose CT Screening for Lung Cancer: A Pragmatic Approach

C Horst<sup>1</sup>, J Dickson<sup>1</sup>, S Tisi<sup>1</sup>, M Ruparel<sup>1</sup>, A Nair<sup>1\*</sup>, A Devaraj<sup>2\*</sup>, SM Janes<sup>1\*</sup>

<sup>1</sup>Lungs for Living Research Centre, UCL Respiratory, University College London, London, UK.

<sup>2</sup>Royal Brompton and Harefield NHS Foundation Trust, London, UK.

\*Corresponding authors

### The SUMMIT Study Pulmonary Nodule and Incidental Finding Management Protocol

#### The SUMMIT Pulmonary Nodule Protocol

This protocol is based largely on the British Thoracic Society Guideline for the Investigation and Management of Pulmonary Nodules(1). The SUMMIT guidelines have been adapted to a three-year screening programme [baseline (Y0), year 1 (Y1), and year 2 (Y2)] with a randomisation element at the second visit (Y1). Deviations or additions to the BTS guidelines are denoted in **bold** boxes. Evidence for these changes are cited in call-outs at the bottom of each protocol (\*, § etc) and incorporate best practice recommendations from the Fleischner Society (2,3).

Some general principles when using this protocol:

- Overall management is based on the largest nodule, or the nodule requiring most immediate follow-up.
- At any time point, radiologists can upgrade to next level of management if nodules are felt to have suspicious features and recommended management is felt not to be sufficient.
- Growing solid nodules should be  $>200\text{mm}^3$  (or 8mm in diameter if unreliably segmented) before referral to multidisciplinary teams (MDTs) in order to prevent unnecessary referrals to secondary care sites. This is because for smaller nodules, MDTs are likely to recommend surveillance CT anyway, in which case this is best delivered within the screening programme. For nodules that have volumetrically grown  $\geq 25\%$  at 3 months but are  $\leq 200\text{mm}^3$ , and nodules with unreliable volumetry that appear to have equivocally grown on visual inspection, a repeat CT in 3 months is performed within the study.
- In cases where volumetry is not possible for a solid nodule and diameter measurements are made, assessment should be based on unequivocal growth (as per BTS Guidelines).
- For sub-solid nodules (SSNs), 'growing morphology' refers to a new or increasing solid component. SSNs with 'altered morphology' refers to bubble-like lucencies or pleural retraction. If the solid component grows but is still  $<8\text{mm}$ , then the increase should be at least 2mm since the previous LDCT or observed on two CTs before MDT referral.
- Nodular consolidation  $>8\text{mm}$  or endobronchial lesions or other nodules  $>8\text{mm}$  that appear more likely to be inflammatory, but where malignancy is a consideration, may be scanned again at three months. If unchanged or growing at the follow-up scan, these should be referred to MDT. Opacities that are clearly

inflammatory (eg tree-in-bud or endobronchial mucous) and where malignancy is not a consideration do not require follow up.

- If a part solid nodule has a solid component that is >90% of the total nodule size, then this nodule is considered solid and is assessed as such(4).
- Intrapulmonary lymph nodes (IPLNs), also known as perifissural nodules, are nodules with specific benign characteristics, including triangular or lentiform shape, often attached to a fissure. Nodules with these characteristics are highly unlikely to be malignant, and therefore can be marked and tagged with the appropriate classifier, but do not affect management and do not confer any follow-up requirement(5). This approach is consistent with BTS guidelines.

Figure S1—SUMMIT Pulmonary Nodule Protocol Flow Diagrams

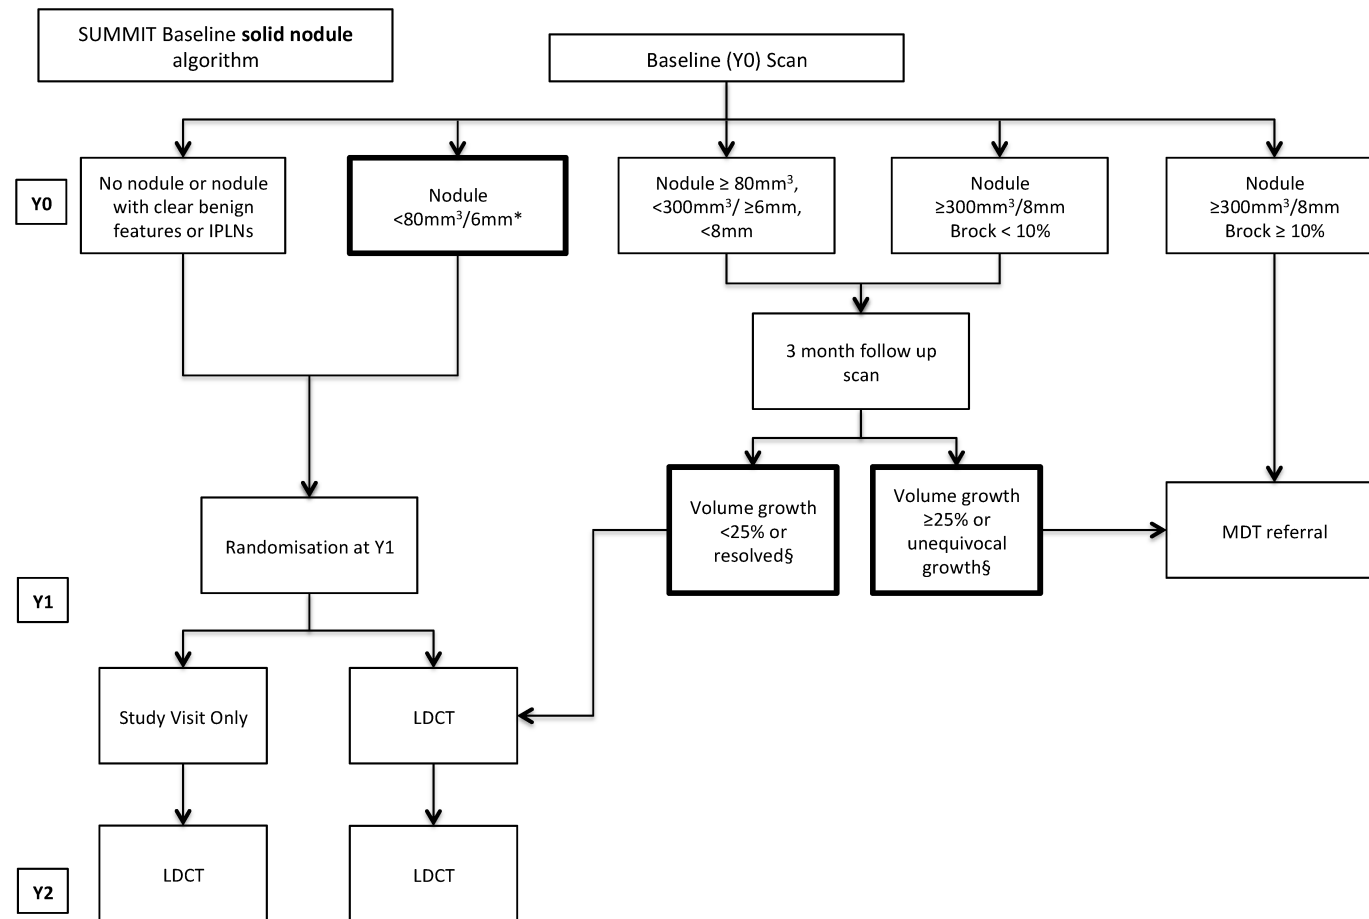

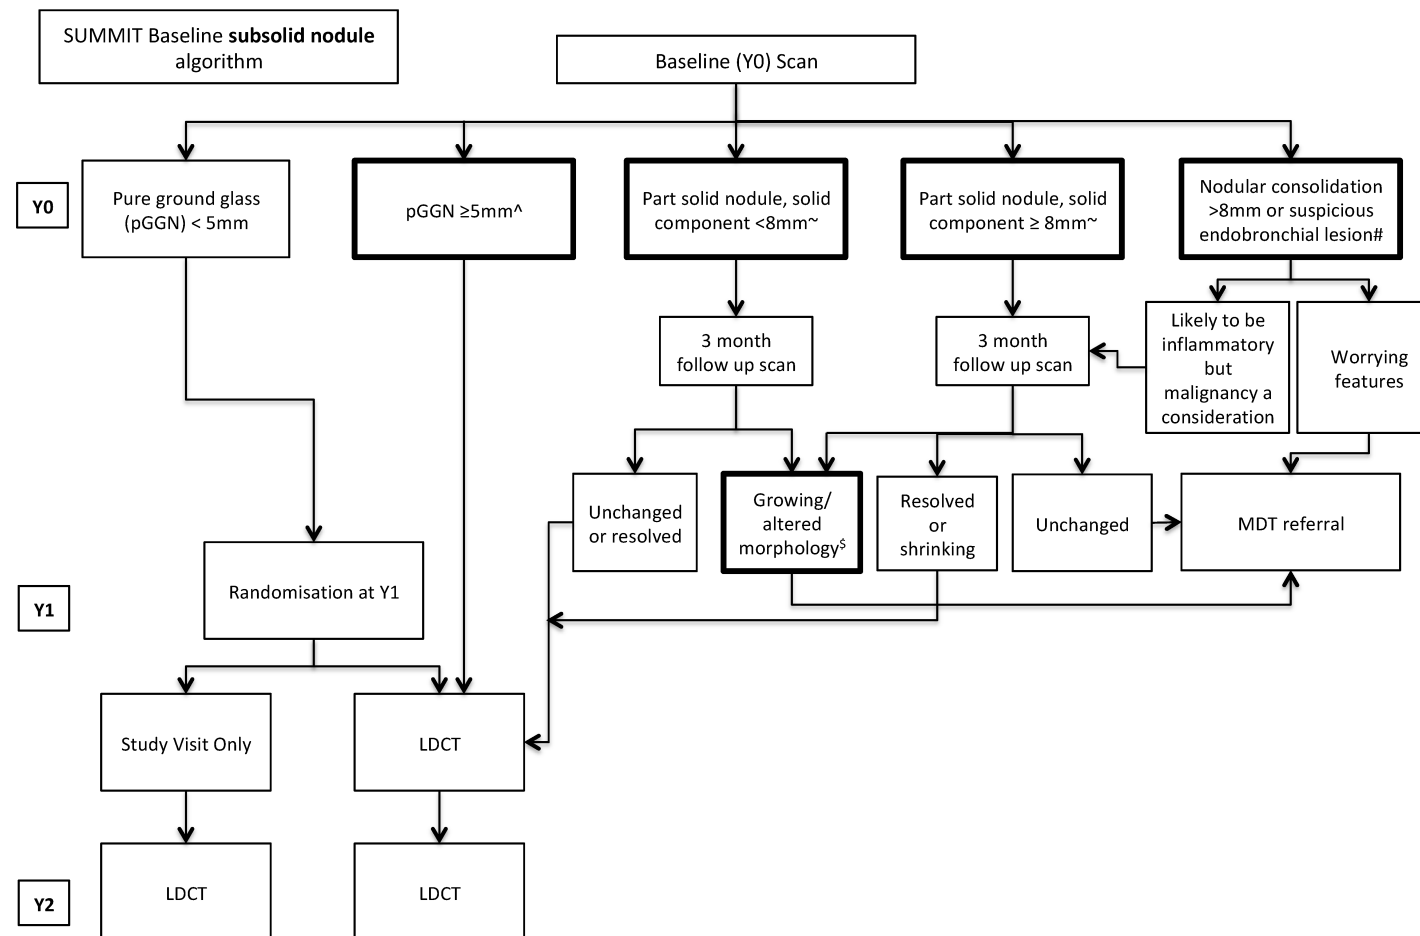

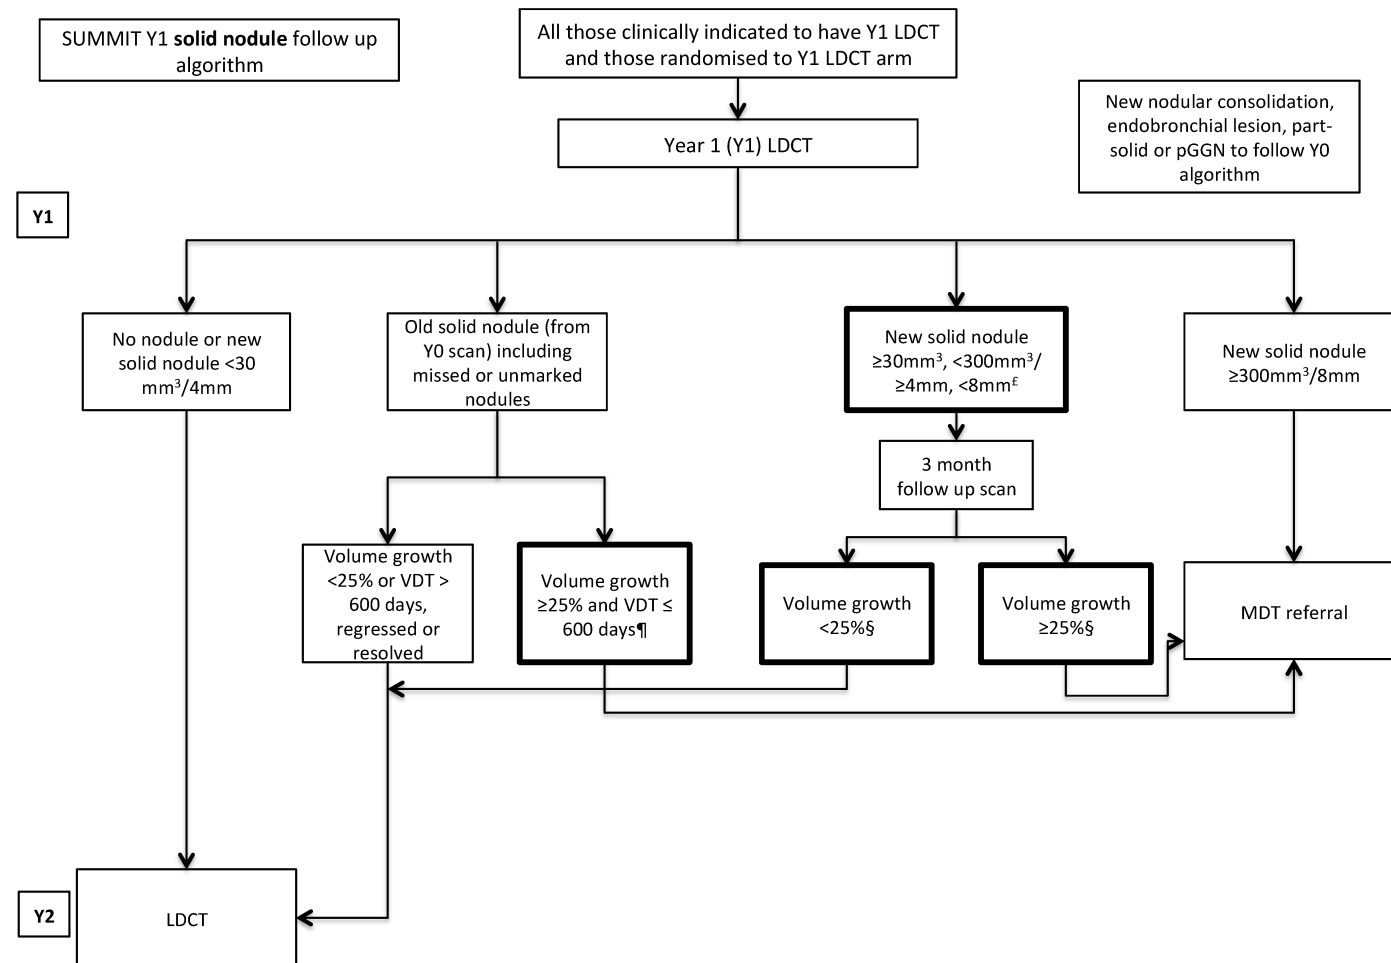

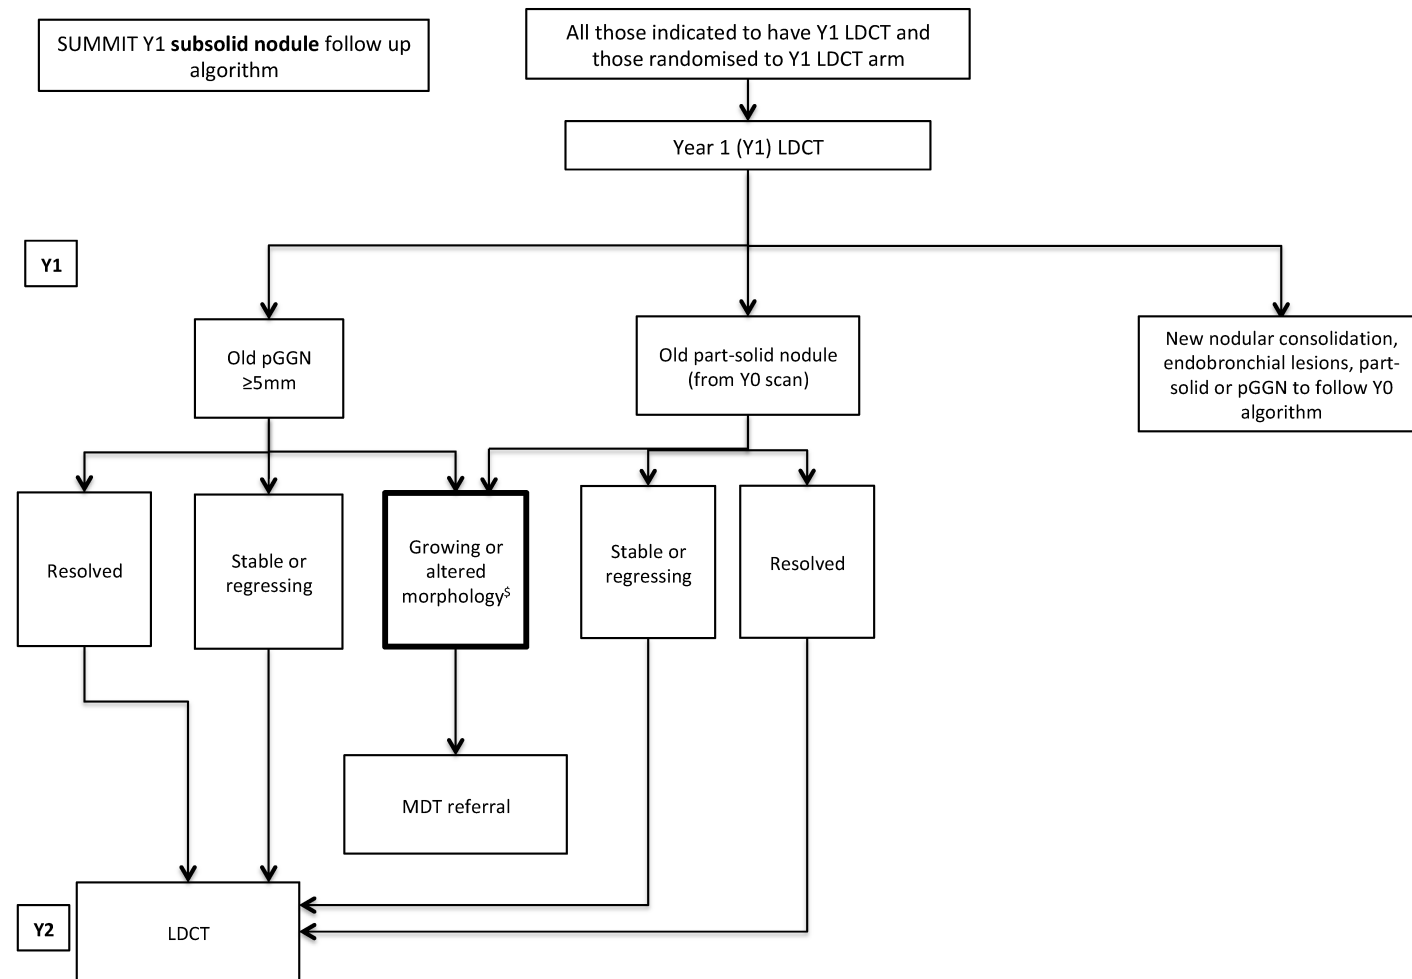

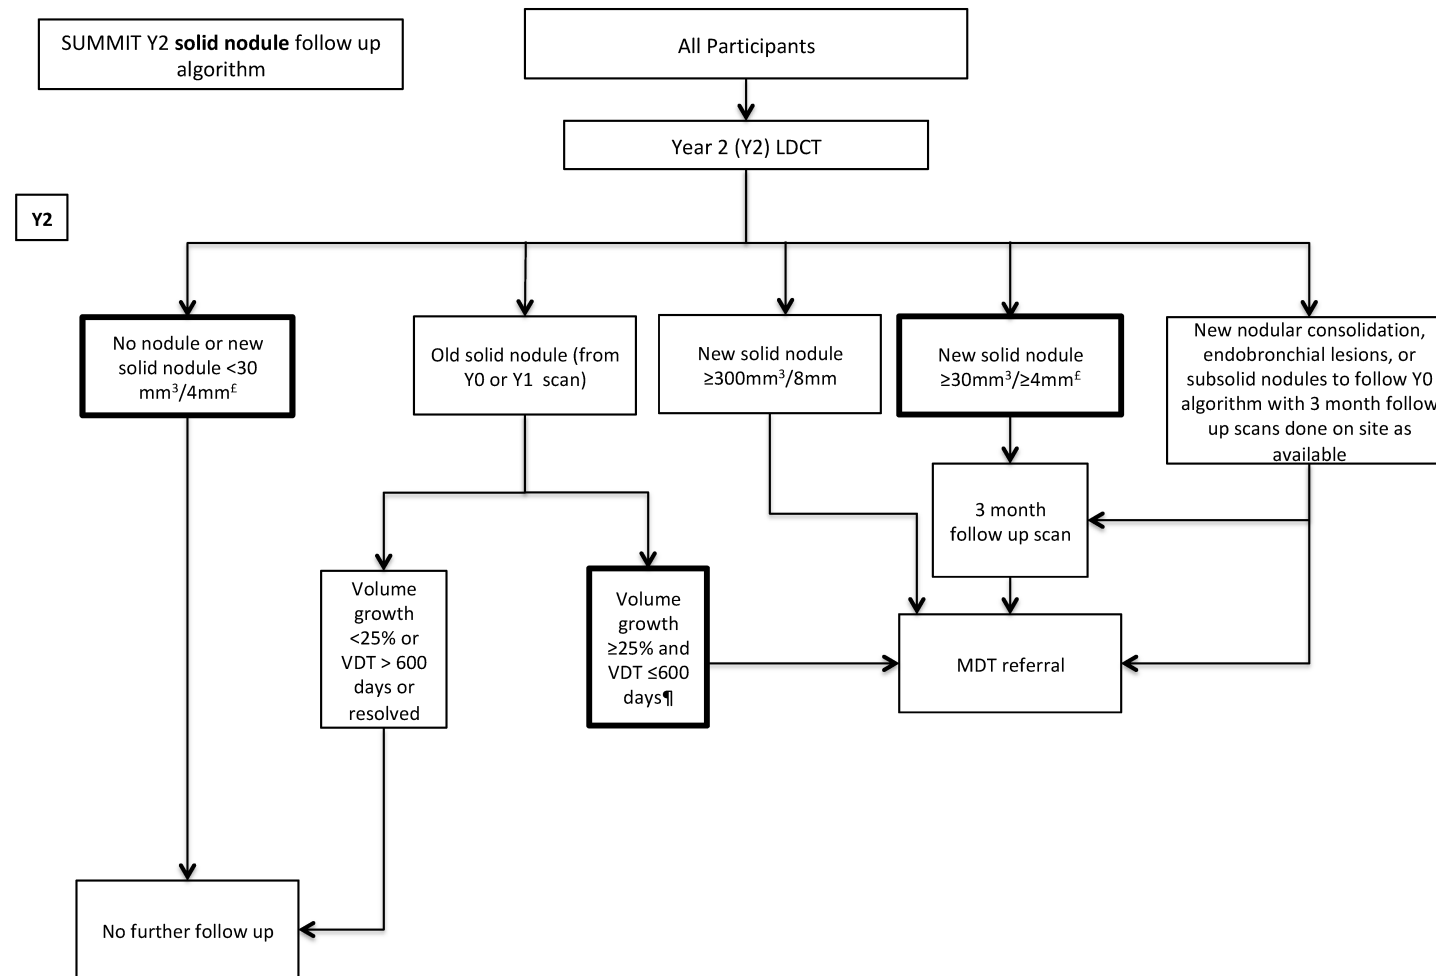

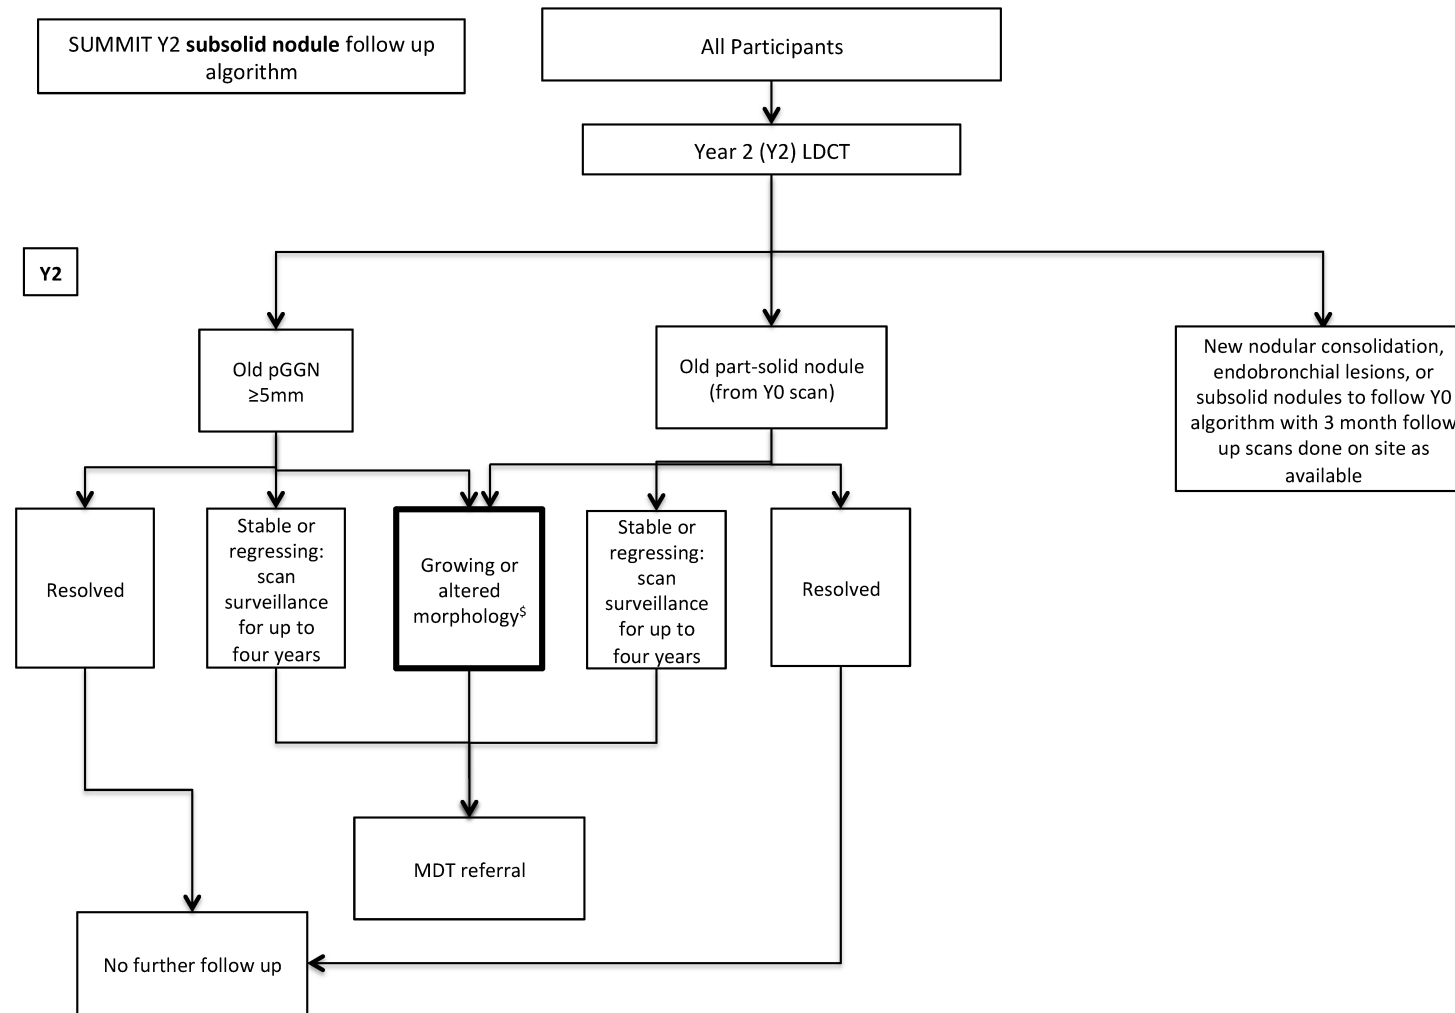



**KEY**

\* Deviation from BTS: no provision for nodules 5-6mm in diameter (where volume not measured) to have 12 month follow up. These will be randomised at Y1 to annual or biennial scans.

§ Simplification of BTS: Volume doubling time (VDT) is not used for growth assessments at 3 month follow up for new or baseline nodules, as  $\geq 25\%$  growth at 3 months implies a VDT of less than 400 days. If volume growth is  $\geq 25\%$  but the nodule still has a volume  $\leq 200\text{mm}^3$ , a repeat scan within the study is indicated, as an MDT referral for a nodule of that size is likely only to instigate further surveillance, which can take place within the study.

^ Deviation from BTS: GGNs  $\geq 5\text{mm}$  in diameter will be scanned at Y1 and Y2 for monitoring, but not before. Data has shown that GGNs, if persistent, are likely to represent adenocarcinoma in situ (AIS) and are therefore unlikely to require immediate intervention (4,6).

~ Deviation from BTS: The Brock Score is not used for assessing PSNs, due to its likelihood of underestimating malignancy in this nodule type. Instead, a distinction has been made regarding the solid component diameter ( $< 8\text{mm} \geq$ ) to try to minimise unnecessary referrals to MDTs, for nodules with small solid components that are stable, and may represent indolent or overdiagnosed cancers. For PSNs with larger solid components that persist, referral to MDT is indicated.

# Addition to BTS: Opacities that are clearly inflammatory (eg tree-in-bud or endobronchial mucous) and where malignancy is not a consideration do not require follow up. Nodular consolidation  $> 8\text{mm}$  or endobronchial lesions or other nodules  $> 8\text{mm}$  that appear more likely to be inflammatory, but where malignancy is a consideration, may be scanned again at three months. If these nodules remain unchanged or are growing at the follow-up scan, they should be referred to MDT. Such opacities if  $< 8\text{mm}$  should follow the normal nodule algorithm.

\$ Addition to BTS: 'Growing morphology' refers to a new or increasing solid component. SSNs with 'altered morphology' refers to bubble-like lucencies or pleural retraction. If the solid component grows but is still  $< 8\text{mm}$ , then the increase should be at least 2mm since the previous LDCT or observed on two CTs before MDT referral, as a repeat surveillance scan is the most likely outcome from MDT for a nodule of this size, and this can be performed within the study.

£ Addition to BTS for a screening programme: new nodules which have developed since the previous annual scan should have a lower threshold ( $\geq 30\text{mm}^3$  or 4mm diameter) for follow up, due to increased likelihood of malignancy (7).

¶ Deviation from BTS: VDT is applied at annual follow up scans and compared to baseline (or Y1) scans, as per BTS. VDT  $\leq$  600 days and volume growth of  $\geq$ 25% is required for MDT referral to be made.; BTS has two VDT cut-offs (400 days and 600 days), which we have amalgamated into one cutoff for simplicity.

The SUMMIT Study Incidental Findings Management Protocol

The SUMMIT Study Incidental Findings Management Protocol was developed using guidelines and evidence available at the time of protocol development (2018). Where evidence or guidelines were not available, expert opinion was sought. The table below captures the clinically actionable findings that we are either following up within the study, or are asking that primary or secondary care colleagues follow up, where appropriate. Other data points, not listed here, are being collected for research purposes only, for example coronary artery calcification (CAC) and emphysema, as described in the main article text.

Table S1—SUMMIT Actionable Incidental Findings Protocol

| Condition/finding              | Description                                                                                                                                                                                                              | Action by  | Recommended action                                                                      | Rationale                                                           |
|--------------------------------|--------------------------------------------------------------------------------------------------------------------------------------------------------------------------------------------------------------------------|------------|-----------------------------------------------------------------------------------------|---------------------------------------------------------------------|
| <b>Lung cancer</b>             | Abnormality suggestive of lung cancer including consolidation and pleural thickening with worrying features, or unilateral pleural effusion.                                                                             | Study team | Urgent referral to local lung cancer MDT.                                               | Routine standard of care                                            |
| <b>Other cancer (non-lung)</b> | Abnormality suggestive of cancer (non-lung) including breast lesions requiring triple assessment                                                                                                                         | Study team | Urgent referral to local site-specific cancer MDT.                                      | Routine standard of care                                            |
| <b>Emphysema and COPD</b>      | Evidence of airflow limitation on pre-bronchodilator spirometry (FEV <sub>1</sub> /FVC<70%) who are not known to have COPD and report persistent chronic cough (duration > 6 weeks) and/or breathlessness (MRC score >1) | GP         | Clinical review and consider post bronchodilator spirometry assessment for COPD.        | NICE guidelines (8)                                                 |
| <b>Bronchiectasis</b>          | Severe = luminal diameter relative to the accompanying artery diameter is greater than three times the size.                                                                                                             | GP         | Clinical review and if symptomatic a non-urgent referral to the local respiratory team. | Relationship between bronchiectasis imaging and disease severity(9) |
| <b>Interstitial lung</b>       | >10% reticulation with fibrotic features i.e. traction                                                                                                                                                                   | GP         | Clinical review and non-urgent referral to local                                        | ILD studies                                                         |

|                                                      |                                                                                                                                                                                                                                       |            |                                                                                                                                                                                 |                                         |
|------------------------------------------------------|---------------------------------------------------------------------------------------------------------------------------------------------------------------------------------------------------------------------------------------|------------|---------------------------------------------------------------------------------------------------------------------------------------------------------------------------------|-----------------------------------------|
| <b>disease</b>                                       | bronchiectasis, as this denotes significant degree of ILD that may be clinically significant.(10,11)                                                                                                                                  |            | respiratory team.                                                                                                                                                               | (10,11)<br>Specialist opinion           |
| <b>Diffuse Pleural Thickening</b>                    | Diffuse pleural thickening without overtly worrying features.                                                                                                                                                                         | Study team | Annual scan within the study.                                                                                                                                                   | Specialist opinion                      |
| <b>Bilateral pleural effusions</b>                   | Bilateral pleural effusions.                                                                                                                                                                                                          | GP         | Participant and GP informed of finding and a recommendation made to investigate further for transudative causes, as per British Medical Journal (BMJ) article.                  | BMJ(12)                                 |
| <b>Lower respiratory tract infection (LRTI)</b>      | Self-reported acute (or deterioration in chronic) cough <3 weeks duration plus one or more of; fever, pleuritic pain, increased sputum production, shortness of breath or wheeze OR currently taking antibiotics prescribed for LRTI. | Study team | Delay study enrolment and LDCT by 6 weeks on one occasion only. Advise individual to seek review by usual pathway e.g. GP where required for antibiotic treatment if concerned. | SIGN guidelines (13)                    |
| <b>Anterior mediastinal mass (suspected thymoma)</b> | <3cm maximum diameter                                                                                                                                                                                                                 | Study team | Annual scan within study. Inform participant and GP. If stable on successive scans no further action.                                                                           | ACR White Paper(14)                     |
|                                                      | ≥3cm maximum diameter at baseline, OR <3cm but growing on successive scans OR with suspicious features (invasion, irregularity) OR changing morphology.                                                                               | Study team | Urgent referral to local lung cancer MDT.                                                                                                                                       |                                         |
| <b>Ascending thoracic aortic dilatation</b>          | <4cm                                                                                                                                                                                                                                  | N/A        | No further action required.                                                                                                                                                     | ACR Paper(15)                           |
|                                                      | ≥4cm <5.5cm                                                                                                                                                                                                                           | GP         | Non-urgent referral to cardiology team.                                                                                                                                         |                                         |
|                                                      | ≥5.5cm                                                                                                                                                                                                                                | Study team | Urgent referral to local cardiothoracic team.                                                                                                                                   |                                         |
| <b>Thyroid nodules</b>                               | Punctate calcification or associated with local lymphadenopathy.                                                                                                                                                                      | GP         | Request outpatient ultrasound scan of neck.                                                                                                                                     | ACR White Paper(16), specialist opinion |
| <b>Adrenal opacities</b>                             | <1cm                                                                                                                                                                                                                                  | N/A        | No action required.                                                                                                                                                             | NLST (17), ACR White Paper (18)         |
|                                                      | 1-4cm or Hounsfield Units (HU)>10                                                                                                                                                                                                     | Study team | Annual scan within study. Inform participant and GP. If stable on successive scans no further action.                                                                           |                                         |

|                                                                                                                                                                                                                                                                                                                                                                                                                                                                                                                                                                                                                                                                                                                                                       |                                                                                                                                  |            |                                                            |                                   |
|-------------------------------------------------------------------------------------------------------------------------------------------------------------------------------------------------------------------------------------------------------------------------------------------------------------------------------------------------------------------------------------------------------------------------------------------------------------------------------------------------------------------------------------------------------------------------------------------------------------------------------------------------------------------------------------------------------------------------------------------------------|----------------------------------------------------------------------------------------------------------------------------------|------------|------------------------------------------------------------|-----------------------------------|
|                                                                                                                                                                                                                                                                                                                                                                                                                                                                                                                                                                                                                                                                                                                                                       | >4cm                                                                                                                             | Study team | Refer to local endocrine team.                             |                                   |
| <b>Abdominal aortic dilatation</b>                                                                                                                                                                                                                                                                                                                                                                                                                                                                                                                                                                                                                                                                                                                    | <3cm                                                                                                                             | N/A        | No action required.                                        | NICE guideline(19)                |
|                                                                                                                                                                                                                                                                                                                                                                                                                                                                                                                                                                                                                                                                                                                                                       | ≥3cm <5cm                                                                                                                        | GP         | Refer to local vascular team for surveillance.             |                                   |
|                                                                                                                                                                                                                                                                                                                                                                                                                                                                                                                                                                                                                                                                                                                                                       | ≥5cm                                                                                                                             | Study team | Urgent referral to local vascular team for assessment.     |                                   |
| <b>Abdominal solid organ abnormalities (kidney, liver, spleen)</b>                                                                                                                                                                                                                                                                                                                                                                                                                                                                                                                                                                                                                                                                                    | Case by case basis. Radiologists are encouraged only to refer renal lesions if HU>10 (20) or if very likely to be abnormal (21). | Study team | Any abnormalities will be managed on a case by case basis. | NELSON (21), ACR White Paper (20) |
| <b>Osteoporotic (wedge) vertebral fracture(s)</b>                                                                                                                                                                                                                                                                                                                                                                                                                                                                                                                                                                                                                                                                                                     | If reduction in height is >50% normal                                                                                            | GP         | Refer for bone density assessment.                         | Specialist opinion                |
| <b>Additional notes</b>                                                                                                                                                                                                                                                                                                                                                                                                                                                                                                                                                                                                                                                                                                                               |                                                                                                                                  |            |                                                            |                                   |
| <ul style="list-style-type: none"> <li>- Where the reporting radiologist has a high index of suspicion for cancer, but the study management protocol does not lead to an automatic urgent referral, they have the ability to override the protocolised management plan and the study team will arrange the relevant urgent referral.</li> <li>- As this is a lung cancer screening programme, every attempt is made to limit the images to the thoracic cavity in order to decrease detection of clinically uncertain incidental findings, and to decrease radiation exposure to non-relevant areas</li> <li>- Any emergency or very urgent findings will be managed by the study team on a case by case basis according to local services</li> </ul> |                                                                                                                                  |            |                                                            |                                   |

## References

1. Callister MEJE, Baldwin DR, Akram AR, Barnard S, Cane P, Draffan J, et al. British Thoracic Society Guidelines for the Investigation and Management of Pulmonary Nodules. *Thorax*. 2015 Aug;70(August):794–8.
2. Mets OM, De Jong PA, Chung K, Lammers J-WJ, Bram Van Ginneken &, Schaefer-Prokop CM. Fleischner recommendations for the management of subsolid pulmonary nodules: high awareness but limited conformance – a survey study. *Eur Radiol* [Internet]. [cited 2019 Aug 22]; Available from: [https://www.ncbi.nlm.nih.gov/pmc/articles/PMC5052295/pdf/330\\_2016\\_Article\\_4249.pdf](https://www.ncbi.nlm.nih.gov/pmc/articles/PMC5052295/pdf/330_2016_Article_4249.pdf)
3. MacMahon H, Naidich DP, Goo JM, Lee KS, Leung ANC, Mayo JR, et al. Guidelines for Management of Incidental Pulmonary Nodules Detected on CT Images: From the Fleischner Society 2017. *Radiology* [Internet]. 2017;284(1):228–43. Available from: <http://pubs.rsna.org/doi/10.1148/radiol.2017161659>
4. Yip R, Henschke CI, Xu DM, Li K, Jirapatnakul A, Yankelevitz DF. Lung cancers manifesting as part-solid nodules in the national lung screening trial. *Am J Roentgenol*. 2017;208(5):1011–21.
5. De Hoop B, Van Ginneken B, Gietema H, Prokop M. Pulmonary perifissural nodules on CT scans: Rapid growth is not a predictor of malignancy. *Radiology*. 2012 Nov;265(2):611–6.
6. Silva M, Prokop M, Jacobs C, Capretti G, Sverzellati N, Ciompi F, et al. Long-Term Active Surveillance of Screening Detected Subsolid Nodules is a Safe Strategy to Reduce Overtreatment. *J Thorac Oncol* [Internet]. 2018 Oct 1 [cited 2019 Aug 12];13(10):1454–63. Available from: <https://www.sciencedirect.com/science/article/abs/pii/S1556086418307640>
7. Walter JE, Heuvelmans MA, de Jong PA, Vliegenthart R, van Ooijen PMA, Peters RB, et al. Occurrence and lung cancer probability of new solid nodules at incidence screening with low-dose CT: analysis of data from the randomised, controlled NELSON trial. *Lancet Oncol* [Internet]. 2016;2045(16):1–10. Available from: [http://dx.doi.org/10.1016/S1470-2045\(16\)30069-9](http://dx.doi.org/10.1016/S1470-2045(16)30069-9)
8. Rudolf M, Reilly JO, Parnham J, Sloan N, Crowe E, O'Mahony R, et al. Chronic obstructive pulmonary disease in over 16s: diagnosis and management | Guidance and guidelines | NICE. 2016; Available from: <https://www.nice.org.uk/guidance/cg101%0Ahttps://www.nice.org.uk/guidance/CG101/chapter/1-Guidance#managing-stable-copd%0Ahttps://www.nice.org.uk/guidance/cg101/chapter/Appendix-A-The-Guideline-Development-Group>
9. Roberts HR, Wells AU, Rubens MB, Cole PJ, Hansell DM, Milne DG, et al. Airflow obstruction in bronchiectasis: Correlation between computed tomography features and pulmonary function tests. *Thorax*. 2000;55(3):198–204.
10. Kliment CR, Araki T, Doyle TJ, Gao W, Dupuis J, Latourelle JC, et al. A comparison of visual and quantitative methods to identify interstitial lung abnormalities. *BMC Pulm Med*. 2015 Oct 29;15(1).
11. Flaherty KR, Brown KK, Wells AU, Clerisme-Beaty E, Collard HR, Cottin V, et al. Design of the PF-ILD trial: A double-blind, randomised, placebo-controlled phase III trial of nintedanib in patients with progressive fibrosing interstitial lung disease. *BMJ Open Respir Res*. 2017;4(1):1–7.
12. Bhatnagar R, Maskell N. The modern diagnosis and management of pleural effusions [Internet]. Vol. 351, *BMJ* [Online]. 2015 [cited 2018 Sep 4]. Available from: <http://www.bmj.com/subscribe>
13. SIGN: Scottish Intercollegiate Guidelines Network. Guideline 59: Community Management of Lower Respiratory Tract Infection in Adults. SIGN: Scottish

- Intercollegiate Guidelines Network. 2002.
14. Munden RF, Carter BW, Chiles C, MacMahon H, Black WC, Ko JP, et al. Managing Incidental Findings on Thoracic CT: Mediastinal and Cardiovascular Findings. A White Paper of the ACR Incidental Findings Committee. *J Am Coll Radiol* [Internet]. 2018;1–10. Available from: <https://doi.org/10.1016/j.jacr.2018.04.029>
  15. McComb BL, Munden RF, Duan F, Jain AA, Tuite C, Chiles C. Normative reference values of thoracic aortic diameter in American College of Radiology Imaging Network (ACRIN 6654) arm of National Lung Screening Trial. *Clin Imaging*. 2016;40(5):936–43.
  16. Hoang JK, Langer JE, Middleton WD, Wu CC, Hammers LW, Cronan JJ, et al. Managing Incidental Thyroid Nodules Detected on Imaging: White Paper of the ACR Incidental Thyroid Findings Committee. *J Am Coll Radiol* [Internet]. 2015 Feb [cited 2019 Aug 28];12(2):143–50. Available from: <http://www.ncbi.nlm.nih.gov/pubmed/25456025>
  17. Klysiak M. Incidental Non-Cardiovascular, Non-Pulmonary Findings Identified in a Low-Dose CT Lung Cancer Screening Population: Prevalence and Clinical Implications. *Int J Radiol Imaging Technol*. 2015;1(1).
  18. Berland LL, Silverman SG, Gore RM, Mayo-Smith WW, Megibow AJ, Yee J, et al. Managing incidental findings on abdominal CT: White paper of the ACR incidental findings committee. *J Am Coll Radiol* [Internet]. 2010;7(10):754–73. Available from: <http://dx.doi.org/10.1016/j.jacr.2010.06.013>
  19. National Institute for Health and Care Excellence. Guideline scope Abdominal aortic aneurysm: diagnosis and management [Internet]. 2018. Available from: <https://www.nice.org.uk/guidance/gid-cgwave0769/documents/final-scope>
  20. Herts BR, Silverman SG, Hindman NM, Uzzo RG, Hartman RP, Israel GM, et al. Management of the Incidental Renal Mass on CT: A White Paper of the ACR Incidental Findings Committee. *J Am Coll Radiol* [Internet]. 2018;15(2):264–73. Available from: <https://doi.org/10.1016/j.jacr.2017.04.028>
  21. van de Wiel JCM, Wang Y, Xu DM, van der Zaag-Loonen HJ, van der Jagt EJ, van Klaveren RJ, et al. Neglectable benefit of searching for incidental findings in the Dutch-Belgian lung cancer screening trial (NELSON) using low-dose multidetector CT. *Eur Radiol*. 2007;17(6):1474–82.
